# Supplementary material for: Improving ancient DNA read mapping against modern reference genomes
Source: Springer Nature journal article supplement (doi:10.1186/1471-2164-13-178), 2012-05-10
Supplement: 12864_2011_4224_MOESM3_ESM.pdf [file 12864_2011_4224_MOESM3_ESM.pdf]

### Default Parameters

(∞ radiocarbon date)

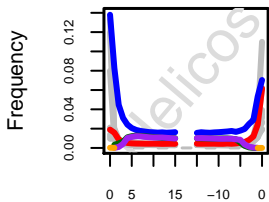

Distance from 5'/3' end

### Modified parameters

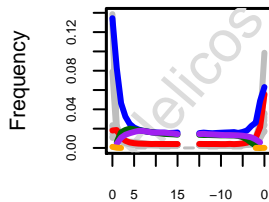

Distance from 5'/3' end

### New Hits

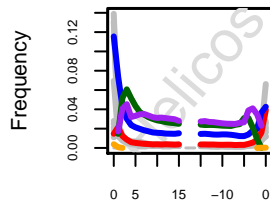

Distance from 5'/3' end

### Default Parameters

(∞ radiocarbon date)

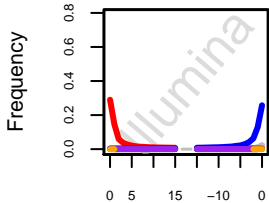

Distance from 5'/3' end

### Modified parameters

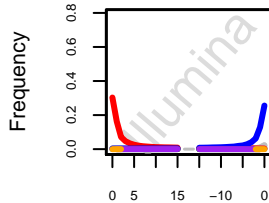

Distance from 5'/3' end

### New Hits

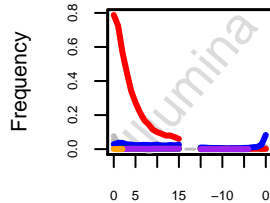

Distance from 5'/3' end

### Default Parameters

(13,389 ± 52BP)

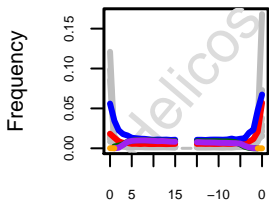

Distance from 5'/3' end

### Modified parameters

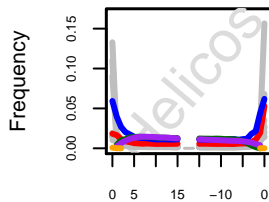

Distance from 5'/3' end

### New Hits

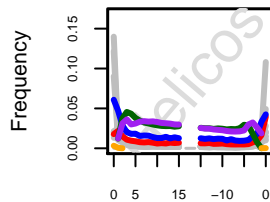

Distance from 5'/3' end
