# Supplementary material for: Improving ancient DNA read mapping against modern reference genomes
Source: Springer Nature journal article supplement (doi:10.1186/1471-2164-13-178), 2012-05-10
Supplement: 12864_2011_4224_MOESM5_ESM.pdf [file 12864_2011_4224_MOESM5_ESM.pdf]

**Default parameters**

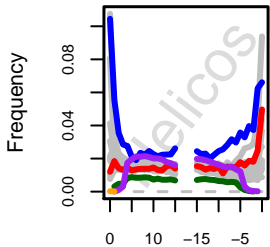

Distance from 5'/3' end

**Modified parameters**

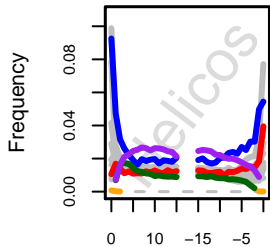

Distance from 5'/3' end

**Default parameters**

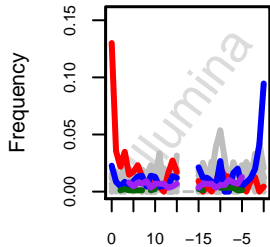

Distance from 5'/3' end

**Modified parameters**

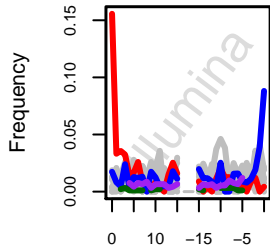

Distance from 5'/3' end
