# Supplementary material for: Improving ancient DNA read mapping against modern reference genomes
Source: Springer Nature journal article supplement (doi:10.1186/1471-2164-13-178), 2012-05-10
Supplement: 12864_2011_4224_MOESM7_ESM.pdf [file 12864_2011_4224_MOESM7_ESM.pdf]

**A****Equus only**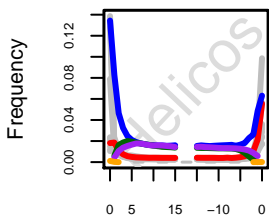**Overlap (Equus)**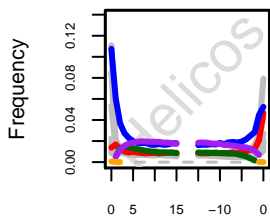**Overlap (Human)**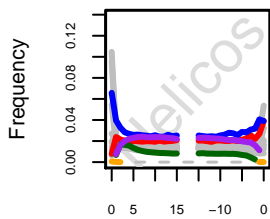**Human only**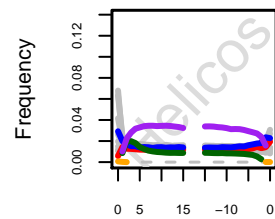**Equus only**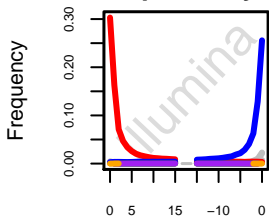**Overlap (Equus)**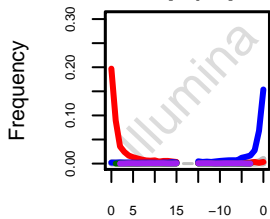**Overlap (Human)**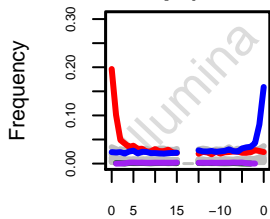**Human only**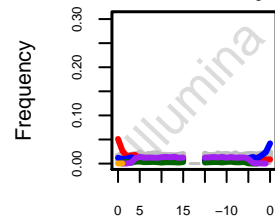

Distance from 5'/3' end

Distance from 5'/3' end

Distance from 5'/3' end

Distance from 5'/3' end

**B****Horse only**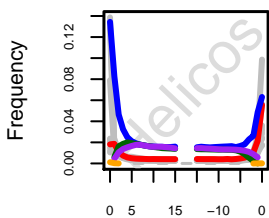**Filtered hits**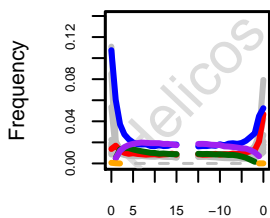**Horse?**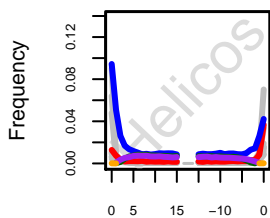**Human?**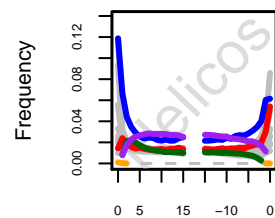**Horse only**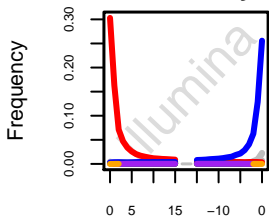**Filtered hits**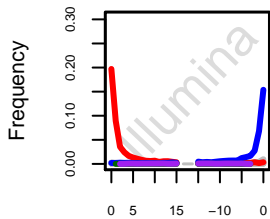**Horse?**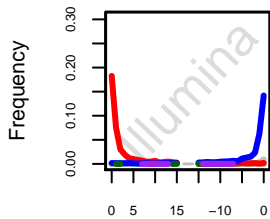**Human?**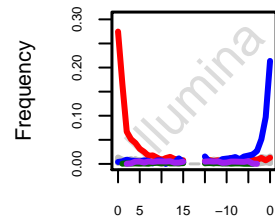

Distance from 5'/3' end

Distance from 5'/3' end

Distance from 5'/3' end

Distance from 5'/3' end
