# Supplementary figures and images for: Improving ancient DNA read mapping against modern reference genomes
Source: Springer Nature journal article supplement (doi:10.1186/1471-2164-13-178), 2012-05-10

# Helicos

Increase relative to default parameters

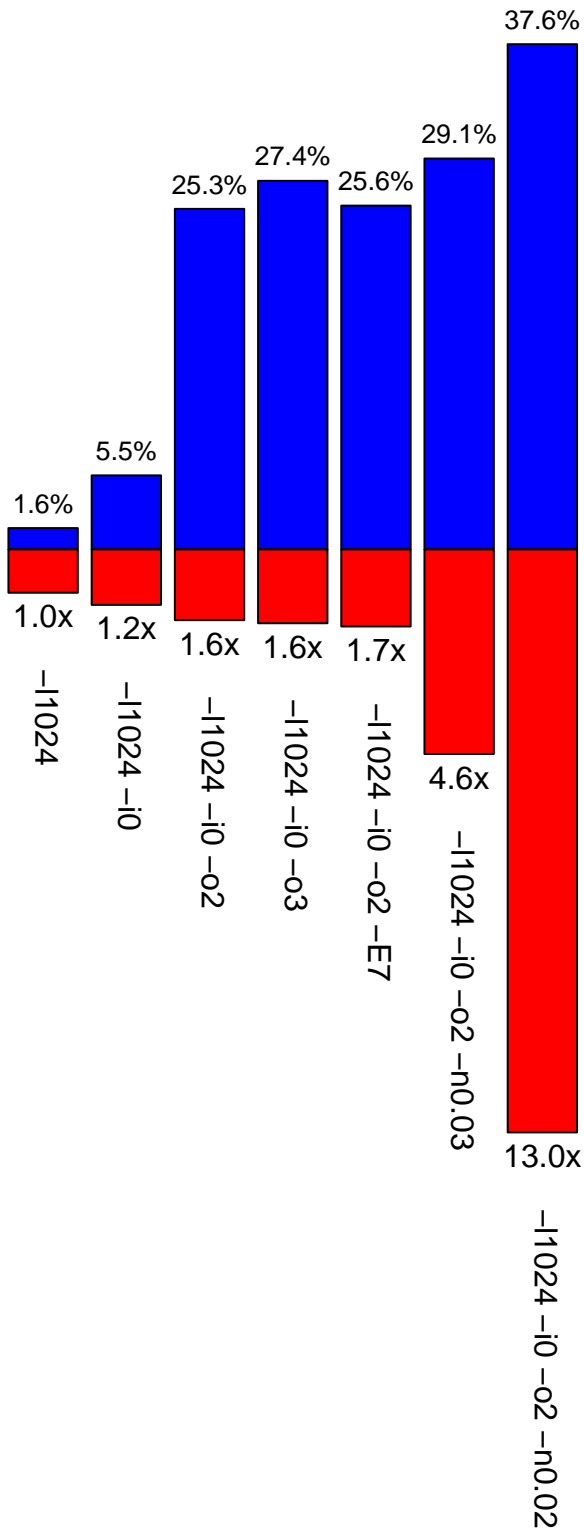

# Illumina

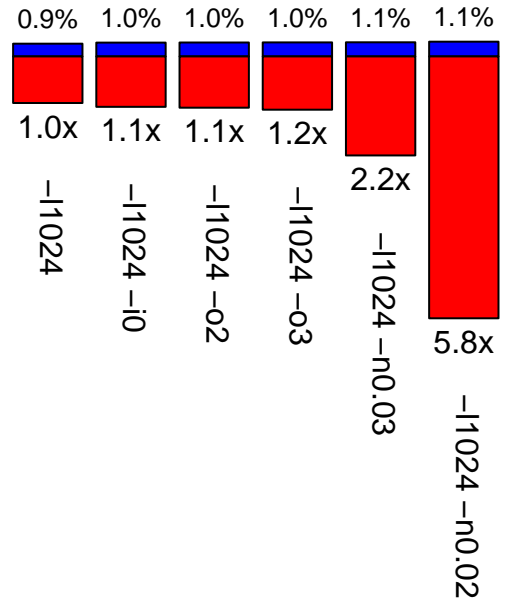

Supplement: 12864_2011_4224_MOESM2_ESM.pdf [file 12864_2011_4224_MOESM2_ESM.pdf]

# Helicos

increase relative to default parameters

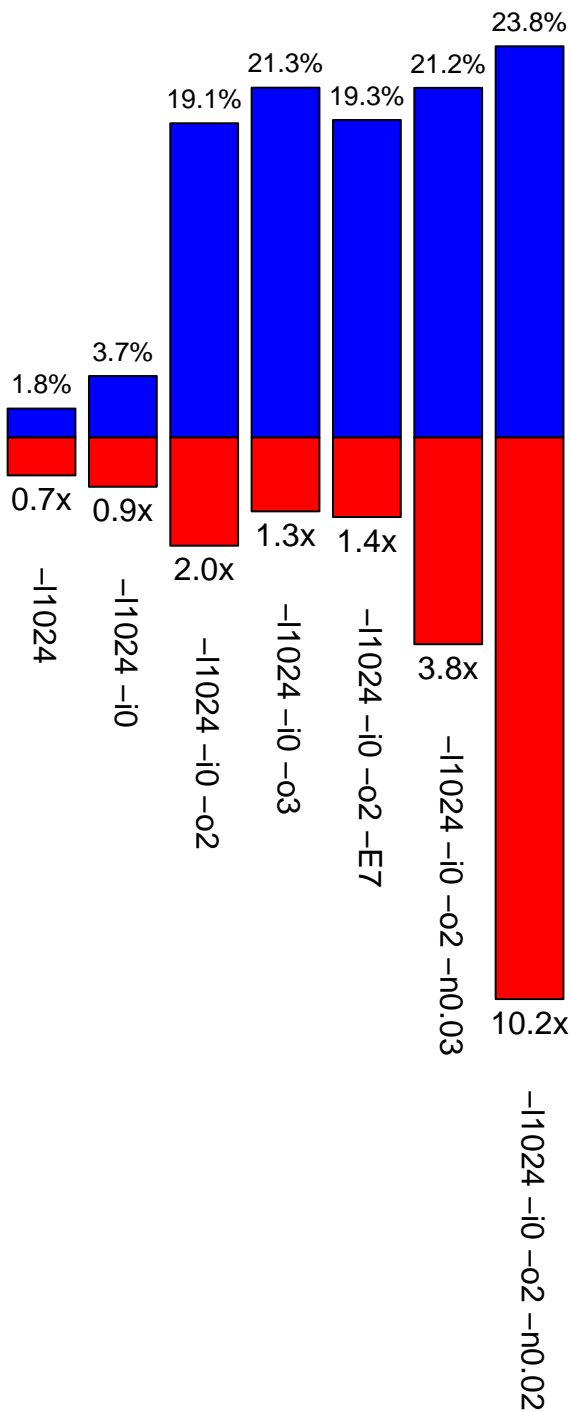

Supplement: 12864_2011_4224_MOESM4_ESM.pdf [file 12864_2011_4224_MOESM4_ESM.pdf]

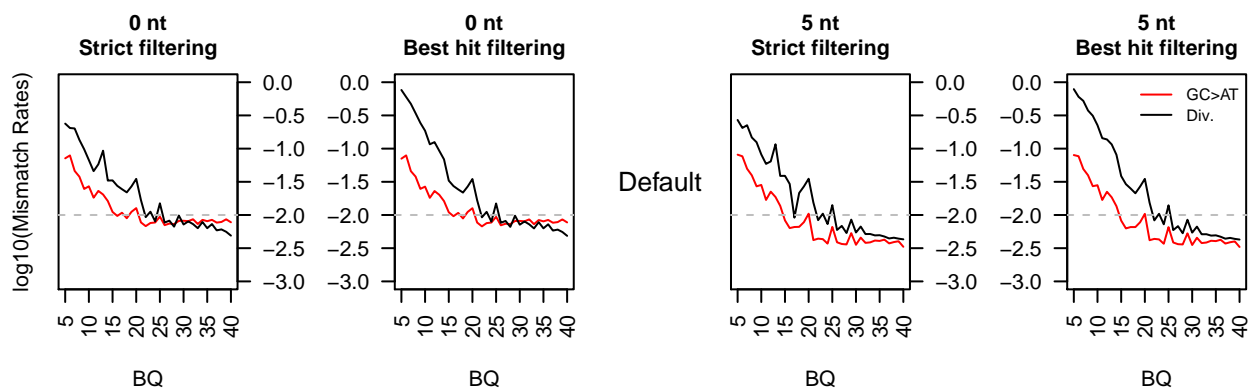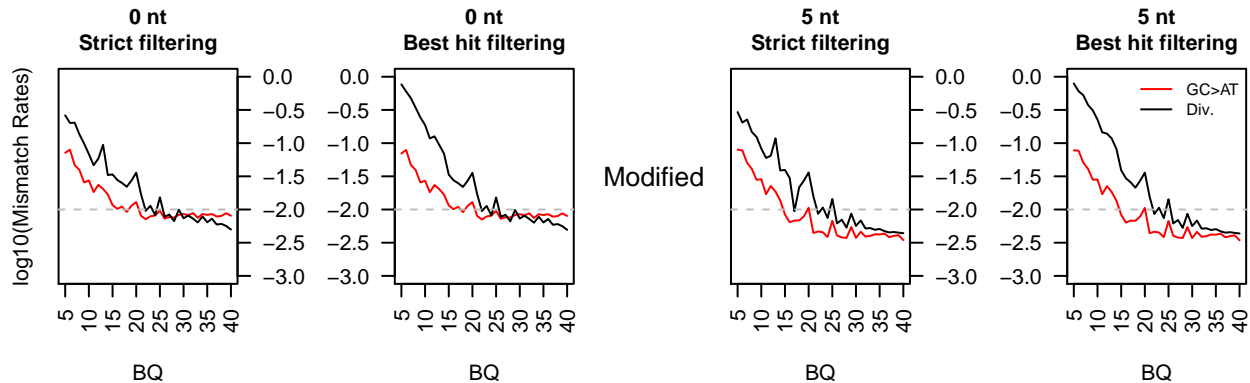

Supplement: 12864_2011_4224_MOESM8_ESM.pdf [file 12864_2011_4224_MOESM8_ESM.pdf]
